# Supplementary material
Source: PubMed Central journal article supplement (PMC4793419)
Supplement: arnl010885.wt1_default.pdf [file arnl010885.wt1_default.pdf]

**WebTable 1.** Included outcome events with ICD-10 codes.

| <b>Outcome</b>                                  | <b>ICD-10 codes</b>                         |
|-------------------------------------------------|---------------------------------------------|
| <b>Autoimmune</b>                               |                                             |
| Thyroid                                         |                                             |
| Graves' disease                                 | E05.0                                       |
| Hashimoto's thyroiditis                         | E06.3                                       |
| Other hyperthyroidism                           | E05.1-5, E05.8-9                            |
| Hypothyroidism                                  | E03                                         |
| Gastrointestinal                                |                                             |
| Celiac disease                                  | K90.0                                       |
| Crohn's disease                                 | K50                                         |
| Ulcerative colitis                              | K51                                         |
| Pancreatitis                                    | K85                                         |
| Primary biliary cirrhosis                       | K74.3                                       |
| Musculoskeletal/systemic                        |                                             |
| Ankylosing spondylitis                          | M08.1, M45                                  |
| Behcet's syndrome                               | M35.2                                       |
| Henoch-Schönlein's purpura                      | D69.0                                       |
| Juvenile arthritis                              | M08.0, M08.2-9                              |
| Kawasaki disease                                | M30.3                                       |
| Myositis                                        | M60                                         |
| Polyarteritis nodosa                            | M30.0                                       |
| Polymyositis/dermatomyositis                    | M33                                         |
| Reiter's syndrome                               | M02.3                                       |
| Rheumatoid arthritis                            | M05, M06                                    |
| Sjögren's syndrome                              | M35.0                                       |
| Systemic lupus erythematosus                    | M32                                         |
| Systemic sclerosis (scleroderma)                | M34                                         |
| Vasculitis, unspecified                         | M30-1 (not M30.0, M30.3, M31.3), I77.6, L95 |
| Wegener's granulomatosis                        | M31.3                                       |
| Hematologic                                     |                                             |
| Autoimmune hemolytic anemia                     | D59.0-1                                     |
| Idiopathic thrombocytopenic purpura             | D69.3                                       |
| Pernicious anaemia                              | D51.0                                       |
| Dermatologic                                    |                                             |
| Erythema nodosum                                | L52                                         |
| Localised lupus erythematosus                   | L93                                         |
| Localised scleroderma                           | L94.0-1, L94.3                              |
| Pemphigoid                                      | L12                                         |
| Pemphigus foliaceus                             | L10.2                                       |
| Pemphigus vulgaris                              | L10.0                                       |
| Psoriasis                                       | L40                                         |
| Vitiligo                                        | L80                                         |
| Miscellaneous                                   |                                             |
| Acute rheumatic fever                           | I00-1                                       |
| Addison's disease                               | E27.1-2                                     |
| Raynaud's disease                               | I73.0                                       |
| Sarcoidosis                                     | D86                                         |
| Type 1 diabetes                                 | E10                                         |
| <b>Neurologic</b>                               |                                             |
| Acute disseminating encephalitis                | G04.0                                       |
| Bell's palsy                                    | G51.0                                       |
| Epilepsy                                        | G40-1                                       |
| Guillain-Barré syndrome                         | G61.0                                       |
| Multiple sclerosis                              | G35                                         |
| Myasthenia gravis                               | G70.0                                       |
| Narcolepsy                                      | G47.4                                       |
| Optical neuritis                                | G36.0, H46                                  |
| Other demyelinating disorders                   | G36-7 (not G36.0, G37.3)                    |
| Other encephalitis, myelitis, encephalomyelitis | G04.8                                       |
| Paralysis                                       | G80-3                                       |
| Transverse myelitis                             | G37.3                                       |
| <b>Venous thromboembolism</b>                   | <b>I26, I80.1-I80.9, I81-2</b>              |

**WebTable 2.** Adverse events according to qHPV vaccination status, bi-nationwide cohort of girls 10-17 years of age in Denmark and Sweden, October 2006 - December 2010.

**Outcomes with less than 5 vaccine-exposed cases.**

| Event                                           | Unvaccinated |                  | Within 180 days following qHPV vaccination |                  |
|-------------------------------------------------|--------------|------------------|--------------------------------------------|------------------|
|                                                 | Events       | IR (95% CI)      | Events                                     | IR (95% CI)      |
| <b>Autoimmune</b>                               |              |                  |                                            |                  |
| Gastrointestinal                                |              |                  |                                            |                  |
| Primary biliary cirrhosis                       | 0            | -                | 0                                          | -                |
| Musculoskeletal/systemic                        |              |                  |                                            |                  |
| Kawasaki disease                                | 7            | 0.29 (0.14-0.62) | 1                                          | 0.43 (0.06-3.09) |
| Polyarteritis nodosa                            | 13           | 0.55 (0.32-0.94) | 0                                          | -                |
| Polymyositis/dermatomyositis                    | 23           | 0.97 (0.64-1.46) | 0                                          | -                |
| Reiter's syndrome                               | 1            | 0.04 (0.01-0.30) | 0                                          | -                |
| Sjögren's syndrome                              | 20           | 0.84 (0.54-1.31) | 2                                          | 0.87 (0.22-3.48) |
| Systemic sclerosis (scleroderma)                | 18           | 0.76 (0.48-1.20) | 2                                          | 0.87 (0.22-3.48) |
| Wegener's granulomatosis                        | 18           | 0.76 (0.48-1.20) | 0                                          | -                |
| Hematologic                                     |              |                  |                                            |                  |
| Autoimmune hemolytic anemia                     | 23           | 0.97 (0.64-1.46) | 0                                          | -                |
| Pernicious anemia                               | 9            | 0.38 (0.20-0.73) | 2                                          | 0.87 (0.22-3.48) |
| Dermatologic                                    |              |                  |                                            |                  |
| Localised lupus erythematosus                   | 25           | 1.05 (0.71-1.56) | 2                                          | 0.87 (0.22-3.48) |
| Pemphigoid                                      | 14           | 0.59 (0.35-1.00) | 1                                          | 0.43 (0.06-3.09) |
| Pemphigus foliaceus                             | 1            | 0.04 (0.01-0.30) | 0                                          | -                |
| Pemphigus vulgaris                              | 5            | 0.21 (0.09-0.51) | 1                                          | 0.43 (0.06-3.09) |
| Miscellaneous                                   |              |                  |                                            |                  |
| Acute rheumatic fever                           | 1            | 0.04 (0.01-0.30) | 0                                          | -                |
| Addison's disease                               | 27           | 1.14 (0.78-1.66) | 1                                          | 0.43 (0.06-3.09) |
| Sarcoidosis                                     | 34           | 1.43 (1.02-2.00) | 4                                          | 1.74 (0.65-4.63) |
| <b>Neurologic</b>                               |              |                  |                                            |                  |
| Acute disseminating encephalitis                | 7            | 0.29 (0.14-0.62) | 1                                          | 0.43 (0.06-3.09) |
| Guillain-Barré syndrome                         | 28           | 1.18 (0.81-1.71) | 0                                          | -                |
| Multiple sclerosis                              | 68           | 2.86 (2.26-3.63) | 4                                          | 1.74 (0.65-4.63) |
| Myasthenia gravis                               | 13           | 0.55 (0.32-0.94) | 0                                          | -                |
| Other demyelinating disorders                   | 19           | 0.80 (0.51-1.25) | 2                                          | 0.87 (0.22-3.48) |
| Other encephalitis, myelitis, encephalomyelitis | 11           | 0.46 (0.26-0.84) | 1                                          | 0.43 (0.06-3.09) |
| Transverse myelitis                             | 9            | 0.38 (0.20-0.73) | 1                                          | 0.43 (0.06-3.09) |

qHPV: quadrivalent human papillomavirus; IR: incidence rate per 100,000 person-years

**WebTable 3.** Additional analyses of selected outcomes events with risk window from day 181 onwards following qHPV vaccine exposure.

|                   | <b>Person-years</b> | <b>Events</b> | <b>IR (95% CI)</b>  | <b>Adjusted rate ratio (95% CI)<sup>a</sup></b> |
|-------------------|---------------------|---------------|---------------------|-------------------------------------------------|
| Behcet's syndrome | 193,162             | 4             | 2.07 (0.78-5.52)    | 3.18 (0.83-12.19)                               |
| Raynaud's disease | 193,077             | 28            | 14.50 (10.01-21.00) | 1.50 (0.95-2.37)                                |
| Type 1 diabetes   | 192,291             | 74            | 38.48 (30.64-48.33) | 1.18 (0.91-1.55)                                |

qHPV: quadrivalent human papillomavirus; IR: incidence rate per 100,000 person-years

<sup>a</sup>The rate ratio as compared with the unvaccinated (events and rates shown in Table 2) and adjusted for country, age in 2-year intervals, calendar year, parental country of birth, parental education, and paternal socioeconomic status.

**WebTable 4.** Post-hoc sensitivity analysis of narcolepsy with risk window from day 181 onwards following qHPV vaccine exposure.

|            | <b>Person-years</b> | <b>Events</b> | <b>IR (95% CI)</b> | <b>Adjusted rate ratio (95% CI)<sup>a</sup></b> |
|------------|---------------------|---------------|--------------------|-------------------------------------------------|
| Narcolepsy | 193,151             | 8             | 4.14 (2.07-8.28)   | 0.64 (0.26-1.57)                                |

qHPV: quadrivalent human papillomavirus; IR: incidence rate per 100,000 person-years

<sup>a</sup>The rate ratio as compared with the unvaccinated (events and rates shown in Table 2) and adjusted for country, age in 2-year intervals, calendar year, parental country of birth, parental education, and paternal socioeconomic status.
